# Supplementary material
Source: publisher site journal article supplement (https://www.spandidos-publications.com/8160/downloadSupplementary)

Figure S1. Flowchart of patient selection.

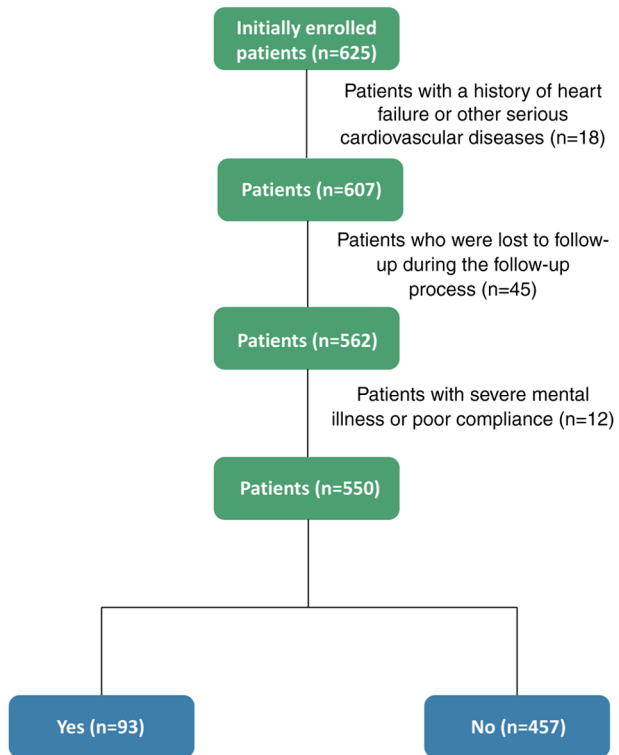

Supplement: Supplementary file 1 [file downloadSupplementary]
